# Supplementary material for: A high-strength silicide phase in a stainless steel alloy designed for wear-resistant applications
Source: PubMed Central journal article supplement (PMC5893616; doi:10.1038/s41467-018-03875-9), 2018-04-10
Supplement: 41467_2018_3875_MOESM1_ESM.pdf [file 41467_2018_3875_MOESM1_ESM.pdf]

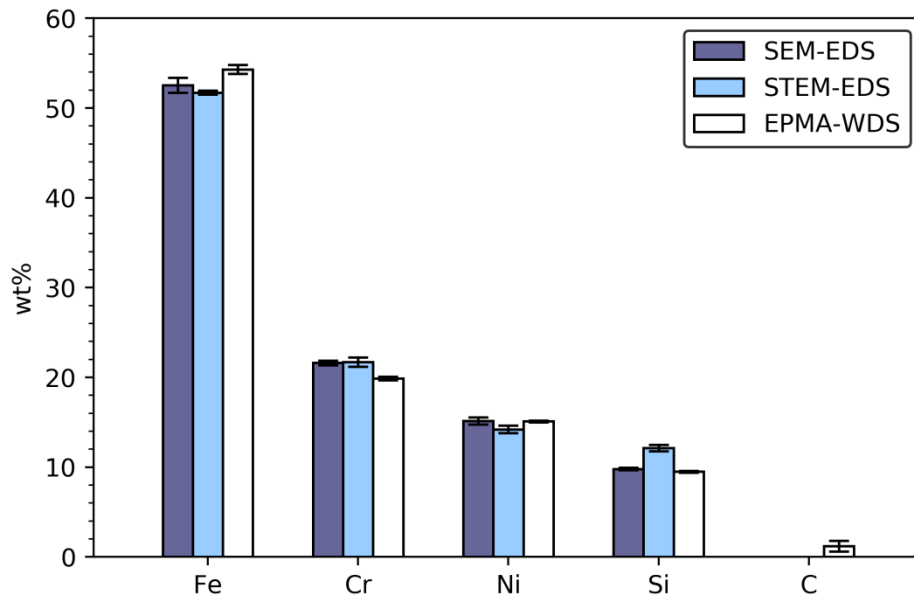

**Supplementary Figure 1** | Average point analysis composition results for the  $\pi$ -ferrosilicide phase using SEM-EDS, STEM-EDS and EPMA-WDS techniques. Errors shown are the standard uncertainty of the mean.

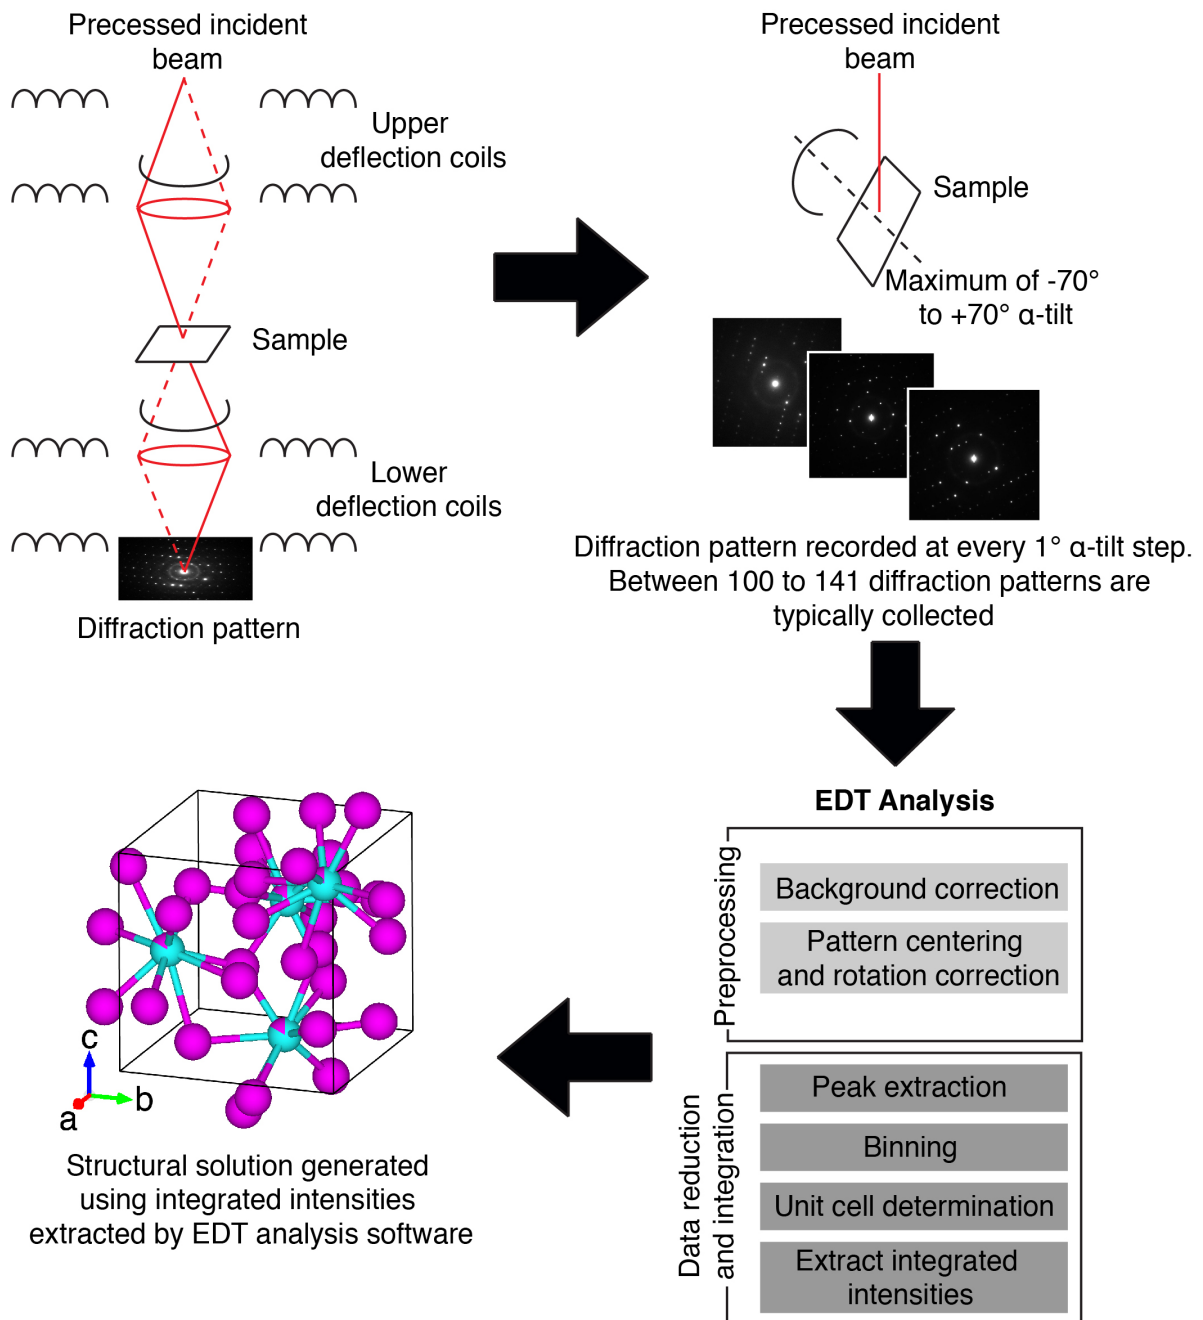

**Supplementary Figure 2** | Schematic outlining the process of collecting a tilt-series in the TEM from a single crystal, through to reconstructing the unit cell using EDT analysis software such as using JANA 2006 or ADT3D, allowing a complete structural solution to be generated. A resultant schematic of the unit cell is produced using VESTA V3.4.

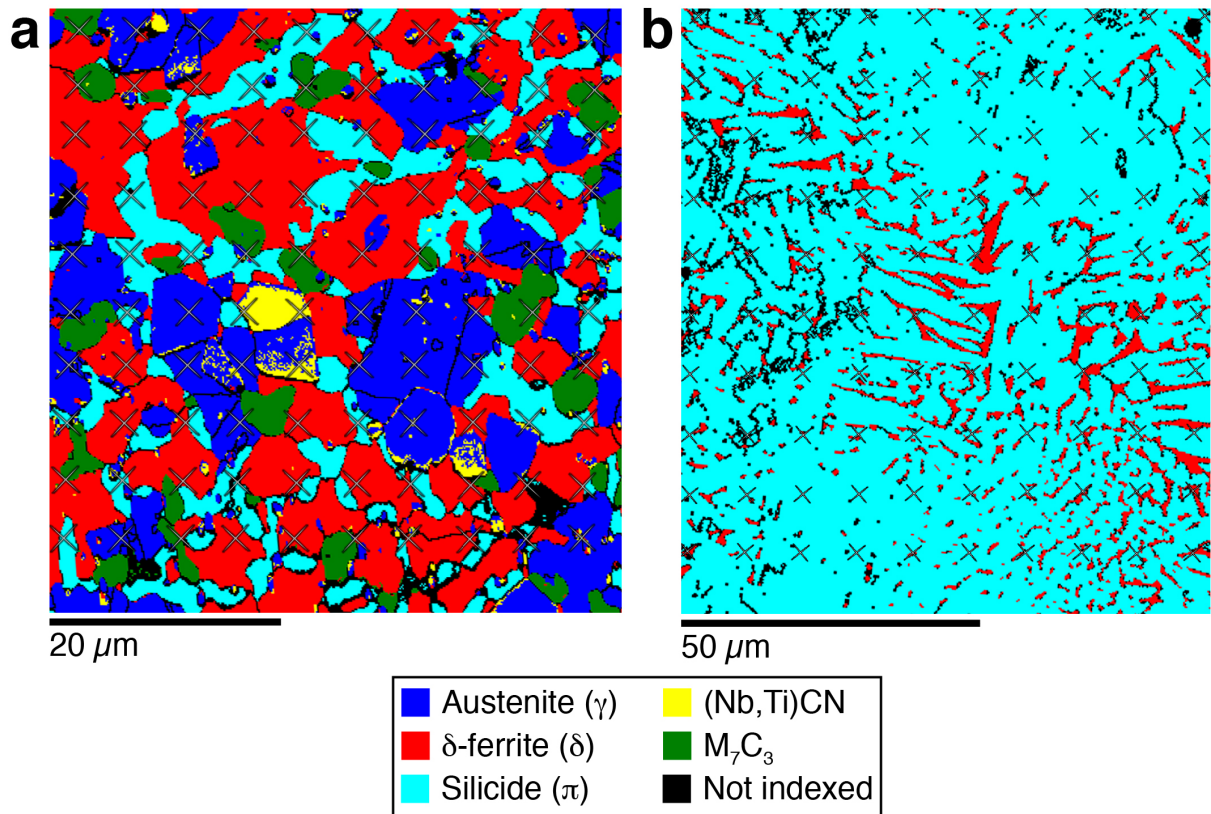

**Supplementary Figure 3** | EBSD phase maps showing nanoindent locations across a region of the RR2450 alloy and carbon-deficient silicide phase ingot. a) 45 x 45  $\mu\text{m}$  nanoindent grid locations across a typical region of the RR2450 alloy; b) 90 x 90  $\mu\text{m}$  nanoindent grid across a typical region of the carbon-deficient silicide phase ingot. As the indents are approximately 200 nm across, indent locations on both maps have been marked with crosses to enhance clarity.

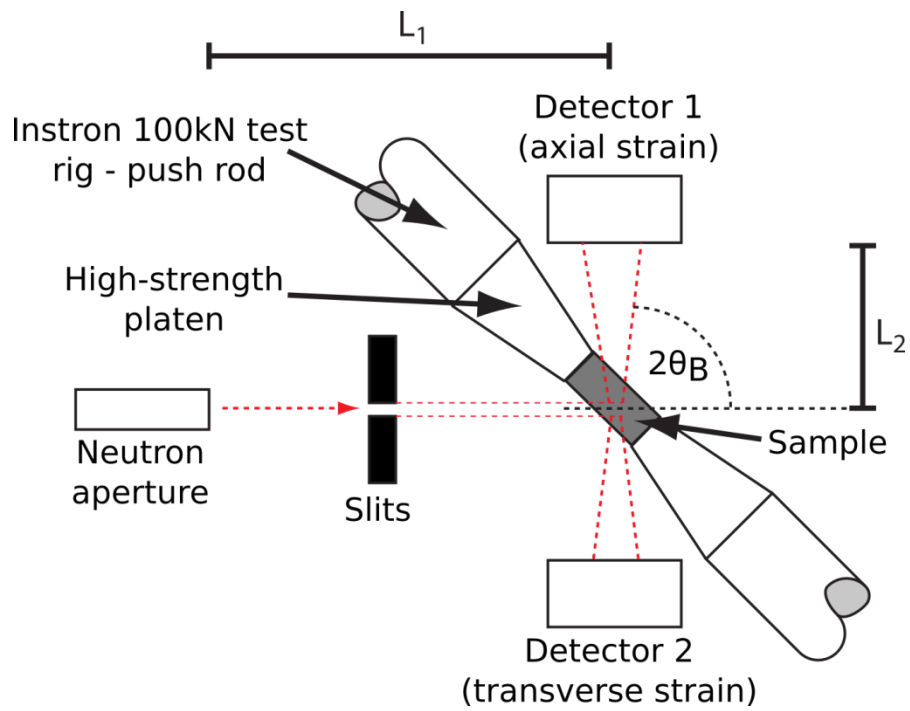

**Supplementary Figure 4** | Schematic showing the typical arrangement of the neutron diffraction and in situ compression study carried out on the RR2450 alloy.

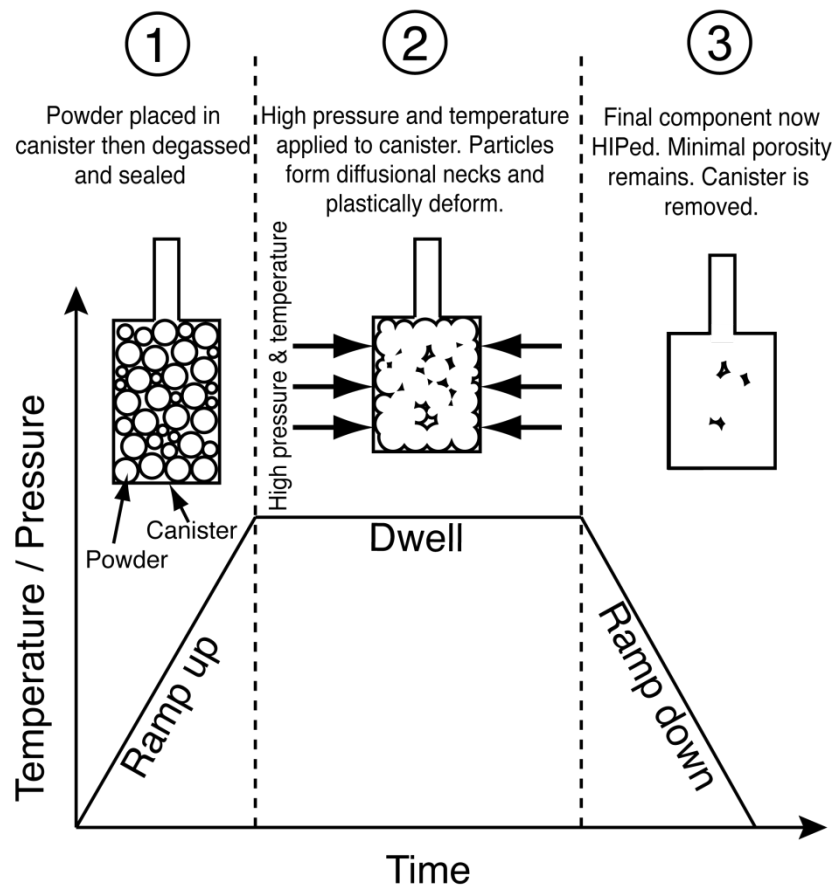

**Supplementary Figure 5** | Schematic overview of a typical HIP cycle profile. This can be described in three stages; ramp-up, dwell and ramp-down. This same type of profile was used to produce HIP consolidated RR2450.

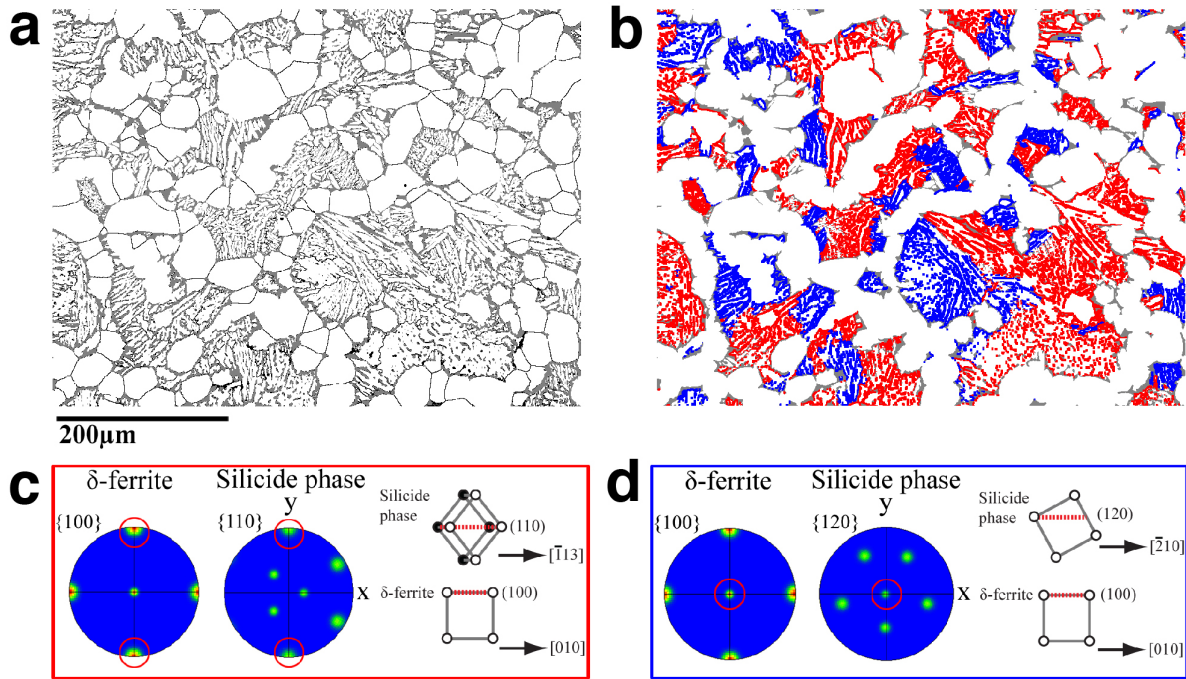

**Supplementary Figure 6** | Observed orientation relationship (OR) between ferrite and  $\pi$ -ferrosilicide from EBSD data. a) phase map of the cast carbon-deficient  $\pi$ -ferrosilicide ingot where ferrite grains are shaded grey and  $\pi$ -ferrosilicide grains are shaded white; b) the two identified orientation relationships are shown on the same phase map, grain boundaries are removed for clarity. The colours used correspond to; c) red – the  $\{100\}_{\delta} \parallel \{110\}_{\pi}$ ,  $\langle 010 \rangle_{\delta} \parallel \langle \bar{1}13 \rangle_{\pi}$  OR showing pole figures from neighbouring ferrite and  $\pi$ -ferrosilicide grains and a schematic representation of the OR; d) blue – the  $\{100\}_{\delta} \parallel \{120\}_{\pi}$ ,  $\langle 010 \rangle_{\delta} \parallel \langle \bar{2}10 \rangle_{\pi}$  OR showing pole figures from neighbouring ferrite and  $\pi$ -ferrosilicide grains and corresponding OR schematic. Growth directions for each OR are indicated with arrows in the schematic in (c) and (d).

**Supplementary Table 1** | Typical compositions (wt% / at%) of the RR2450 and Tristelle 5183 alloys.

| <b>Alloy</b>   | <b>Fe</b> | <b>Cr</b> | <b>Ni</b> | <b>Nb</b> | <b>Si</b> | <b>C</b> | <b>Ti</b> |
|----------------|-----------|-----------|-----------|-----------|-----------|----------|-----------|
| RR2450         | 53.4/48.5 | 21.0/20.5 | 9.0/7.8   | 8.5/4.6   | 5.8/10.5  | 1.8/7.6  | 0.5/0.5   |
| Tristelle 5183 | 54.6/49.7 | 21.0/20.5 | 10.0/8.7  | 7.5/4.1   | 5.0/9.0   | 1.9/8.0  | -         |

**Supplementary Table 2** | Phase fractions (%) as determined by laboratory XRD of the HIPed RR2450 alloy, its parent, Tristelle 5183 and the cast carbon-deficient silicide phase ingot.

| <b>Material</b>                            | <b><math>\gamma</math></b> | <b><math>\delta</math>-ferrite</b> | <b>Silicide phase</b> | <b>(Nb,Ti)CN</b> | <b>M<sub>7</sub>C<sub>3</sub></b> |
|--------------------------------------------|----------------------------|------------------------------------|-----------------------|------------------|-----------------------------------|
| Tristelle 5183                             | 50                         | 23                                 | 8                     | 7                | 12                                |
| HIPed RR2450 Alloy                         | 27                         | 29                                 | 23                    | 8                | 13                                |
| Cast carbon-deficient silicide phase ingot | -                          | 17                                 | 83                    | -                | -                                 |

Phase fractions marked as '-' were not present.

**Supplementary Table 3** | EDT parameters, residuals and crystallographic data for the carbon-containing and carbon-deficient  $\pi$ -ferrosilicide phases with a dynamical refinement carried out.

|                                                              | $\pi$ -ferrosilicide<br>(with carbon)         | $\pi$ -ferrosilicide<br>(carbon deficient)    |
|--------------------------------------------------------------|-----------------------------------------------|-----------------------------------------------|
| <b>Crystal data</b>                                          |                                               |                                               |
| Chemical formula                                             | (Fe,Ni,Cr) <sub>4.18</sub> Si <sub>0.82</sub> | (Fe,Ni,Cr) <sub>3.92</sub> Si <sub>1.08</sub> |
| Crystal system, space group                                  | cubic, $P2_13$                                | cubic, $P2_13$                                |
| a (Å), V(Å <sup>3</sup> )                                    | 6.1908(1), 237.269(11)                        | 6.1669(2), 234.531(13)                        |
| Z                                                            | 4                                             | 4                                             |
| Calculated density (g.cm <sup>-3</sup> )                     | 7.18                                          | 7.06                                          |
| <b>Data collection</b>                                       |                                               |                                               |
| Radiation type                                               | electrons, 120 kV                             | electrons, 120 kV                             |
| Wavelength (Å)                                               | 0.0335                                        | 0.0335                                        |
| Precession angle (deg.)                                      | 0.5                                           | 1.0                                           |
| Projected crystal dimensions (nm <sup>2</sup> ) <sup>1</sup> | 500x160                                       | 126000 (400nm beam)                           |
| Average crystal thickness (refined, nm)                      | 30                                            | 35                                            |
| Resolution (Å)                                               | 0.714                                         | 0.714                                         |
| Tilt step (deg.)                                             | 1                                             | 1                                             |
| No of frames                                                 | 100                                           | 121                                           |
| Completeness                                                 | 100%                                          | 100%                                          |
| No. of used reflections (obs/all)                            | 1327/1323                                     | 2951/2920                                     |
| <b>Dynamical structure refinement</b>                        |                                               |                                               |
| $g_{\max}$ , $S_g^{\max}$ (matrix), $R_{Sg}$ , $N_{or}$      | 1.5, 0.01, 0.6, 96                            | 1.5, 0.01, 0.6, 96                            |
| R1, wR(F) (obs/all)                                          | 6.78/7.03, 9.19/9.20                          | 5.24/5.27, 7.67/7.68                          |
| Goodness of fit                                              | 2.26                                          | 1.67                                          |
| No. of refined parameters <sup>2</sup>                       | 17+100                                        | 17+111                                        |

<sup>1</sup> In case of the carbon-deficient silicide the size of the illuminated part of the crystal was defined by the size of the illuminating beam.

<sup>2</sup> Number of refined parameters is split into scale factors for individual frames and the number of actual structural parameters like atomic coordinates, displacement parameters and occupancy factors.



**Supplementary Table 4** | Atomic coordinates, thermal parameters and occupancy of the RR2450 (carbon containing)  $\pi$ -ferrosilicide phase, determined by dynamical refinement.

| Atom | x           | y           | z           | Ueq (Å <sup>2</sup> ) <sup>1</sup> | Occ.    | Wyckoff |
|------|-------------|-------------|-------------|------------------------------------|---------|---------|
| Fe1  | 0.18647(13) | 0.68647(13) | 0.81353(13) | 0.0055(2)                          | 1       | 4a      |
| Fe2  | 0.37684(16) | 0.70335(15) | 0.45210(15) | 0.0150(3)                          | 1       | 12b     |
| Si3  | 0.9374(2)   | 0.9374(2)   | 0.9374(2)   | 0.0048(5)                          | 0.82(2) | 4a      |
| Fe3  | 0.9374(2)   | 0.9374(2)   | 0.9374(2)   | 0.0048(5)                          | 0.18(2) | 4a      |

<sup>1</sup>Ueq is obtained from anisotropic displacement parameters as:  $U_{eq} = \frac{1}{3} \sum \sum U_{ij} a_i^* a_j^* \mathbf{a}_i \cdot \mathbf{a}_j$ .

**Supplementary Table 5** | Independent interatomic distances of the RR2450 (carbon-containing)  $\pi$ -ferrosilicide phase calculated using dynamical refinement.

| Atom 1 | Atom 2 | Distance (Å) |
|--------|--------|--------------|
| Fe1    | Fe2    | 2.5311(12)   |
| Fe1    | Fe2    | 2.5910(12)   |
| Fe1    | Fe2    | 2.6161(13)   |
| Fe1    | Si3    | 2.3192(15)   |
| Fe2    | Fe2    | 2.5927(14)   |
| Fe2    | Fe2    | 2.6010(13)   |
| Fe2    | Fe2    | 2.6125(13)   |
| Fe2    | Si3    | 2.5055(16)   |
| Fe2    | Si3    | 2.6388(16)   |
| Fe2    | Si3    | 2.5911(16)   |

**Supplementary Table 6** | Atomic coordinates, thermal parameters and occupancy of the cast (carbon deficient)  $\pi$ -ferrosilicide phase, determined by dynamical refinement.

| Atom | x           | y           | z           | Ueq (Å <sup>2</sup> ) <sup>1</sup> | Occ.      | Wyckoff |
|------|-------------|-------------|-------------|------------------------------------|-----------|---------|
| Fe1  | 0.93671(9)  | 0.93671(9)  | 0.93671(9)  | 0.00450(17)                        | 0.875(13) | 4a      |
| Si2  | 0.93671(9)  | 0.93671(9)  | 0.93671(9)  | 0.00450(17)                        | 0.125(13) | 4a      |
| Fe2  | 1.12664(11) | 1.29708(10) | 0.95294(10) | 0.0174(2)                          | 1         | 12b     |
| Si1  | 1.18724(15) | 0.68724(15) | 0.81276(15) | 0.0068(3)                          | 0.954(14) | 4a      |
| Fe3  | 1.18724(15) | 0.68724(15) | 0.81276(15) | 0.0068(3)                          | 0.046(14) | 4a      |

<sup>1</sup>Ueq is obtained from anisotropic displacement parameters as:  $U_{eq} = \frac{1}{3} \sum \sum U_{ij} a_i^* a_j^* \mathbf{a}_i \cdot \mathbf{a}_j$ .

**Supplementary Table 7** | Independent interatomic distances of the cast (carbon-deficient)  $\pi$ -ferrosilicide phase calculated using dynamical refinement.

| Atom 1 | Atom 2 | Distance (Å) |
|--------|--------|--------------|
| Fe1    | Fe2    | 2.5141(8)    |
| Fe1    | Fe2    | 2.5823(8)    |
| Fe1    | Fe2    | 2.6105(8)    |
| Fe1    | Si1    | 2.3104(11)   |
| Fe2    | Fe2    | 2.5993(9)    |
| Fe2    | Fe2    | 2.5783(9)    |
| Fe2    | Fe2    | 2.5977(9)    |
| Fe2    | Si1    | 2.5001(11)   |
